# Supplementary material
Source: publisher figshare collection journal article supplement (https://gsapubs.figshare.com/ndownloader/files/23318084)
Supplement: Supplementary file 1 [file 23318084]

## Sheet: Sheet1
TABLE A7. FIGURED PALYNOMORPH SPECIMENS, TAXON AUTHORITIES AND SAMPLE DETAILS
Fig.	Taxon	Taxon authorities	Sample #	Slide #	Eng. Find. coords
7A	Microbaculatispora sp. cf. M. nodosa	Tiwari, 1965	S014120	1	Q35(3)
7B	Microbaculatispora sp. cf. M. nodosa	Tiwari, 1965	S014120	2	G16
7C	Leiotriletes directus	Balme and Hennelly, 1956	S014117	1	R23
7D	Cyclogranisporites gondwanensis	Bharadwaj and Salujha, 1964	S014120	1	D35(1)
7E	Horriditriletes ramosus	(Balme and Hennelly, 1956) Bharadwaj and Salujha, 1964	S014103	1	Y32(2)
7F	Dulhuntyispora parvithola	(Balme and Hennelly, 1956) Potonié, 1960	S014150	2	Q31(2)
7G	Triplexisporites playfordii	(de Jersey and Hamilton, 1967) Foster, 1979	S014133	1	D16(4)
7H	Triquitrites proratus	Balme, 1970	S014113	K	Y33(2)
7I	Brevitriletes bulliensis	(Helby, 1970 ex de Jersey, 1979) de Jersey and Raine, 1990	S014103	1	Y31(4)
7J	Playfordiaspora crenulata	(Wilson, 1962) Foster, 1979	S014129	1	Q32(1)
7K	Reduviasporonites chalastus	(Foster, 1979) Elsik, 1999	S014101	K	O33(3)
7L	Quadrisporites horridus	Hennelly, 1958 emend. Potonie and Lele, 1961	S014114	1	K32
7M	Leiosphaeridia sp.	Generic authority: Eisenack, 1958	S014132	1	S29(1)
7N	Thymospora ipsviciensis	(de Jersey, 1962) Jain, 1968	S014132	1	O25(3)
10A	Lundbladispora springsurensis	de Jersey, 1979	S014127	1	S25
10B	Lundbladispora sp. A	(sensu Foster, 1979, 1982)	S014127	1	X47(1)
10C	Rewanispora foveolata	de Jersey, 1970	S014117	1	K25(3)
10D	Rewanispora foveolata	de Jersey, 1970	S014125	1	K16(2)
10E	Limatulasporites limatulus	(Playford, 1965) Helby & Foster in Foster, 1979	S014132	1	G12
10F	Limatulasporites sp. cf. L. fossulatus	(Balme, 1970) Helby & Foster in Foster, 1979	S014132	1	X45(3)
10G	Lunatisporites pellucidus	(Goubin, 1965) Helby in de Jersey, 1972	S014132	1	Y46(1)
10H	Pteruchipollenites gracilis	(Segroves, 1969) Foster, 1979	S014114	1	M34
10I	Alisporites australis	de Jersey, 1962	S014133	1	F40
10J	Aratrisporites tenuispinosus	Playford, 1965	S014132	1	E21
10K	Aratrisporites plicatus	de Jersey and Hamilton, 1967	S014129	1	Y36(3)
